# Supplementary material
Source: ML conference proceedings conference paper supplement (https://openaccess.thecvf.com/content/ICCV2025/html/Wu_MP-HSIR_A_Multi-Prompt_ICCV_2025_paper.html)
Supplement: Supplementary file 1 [file Wu_MP-HSIR_A_Multi-Prompt_ICCV_2025_supplemental.pdf]

# Supplementary Materials for MP-HSIR: A Multi-Prompt Framework for Universal Hyperspectral Image Restoration

Zhehui Wu<sup>1</sup> Yong Chen<sup>2</sup> Naoto Yokoya<sup>3,4</sup> Wei He<sup>1,4\*</sup>

<sup>1</sup> Wuhan University <sup>2</sup> Jiangxi Normal University <sup>3</sup> The University of Tokyo

<sup>4</sup> RIKEN Center for Advanced Intelligence Project

{wuzhehui, weihe1990}@whu.edu.cn, chen\_yong@jxnu.edu.cn, yokoya@k.u-tokyo.ac.jp

## A. Degradation Predictor

The proposed universal multi-prompt framework, MP-HSIR, can perform specific restoration tasks either based on human instructions or autonomously via the degradation predictor. In this work, we employ a ResNet-34 network with fast Fourier convolution [6] to train classification models separately on natural scene and remote sensing hyperspectral datasets. The binary cross-entropy loss used for training is defined as follows:

$$\mathcal{L} = -\frac{1}{N} \sum_{i=1}^N [y_i \log p_i + (1 - y_i) \log (1 - p_i)], \quad (1)$$

where  $N$  denotes the number of samples,  $p_i$  represents the output after sigmoid activation, and  $y_i$  is the corresponding ground-truth label. The training was conducted with a batch size of 64, using the same optimizer as in the restoration experiments. The initial learning rate was set to  $1 \times 10^{-4}$  and progressively decreased to  $1 \times 10^{-6}$  via cosine annealing [24]. The model was trained for 1000 epochs on the natural scene hyperspectral dataset and 4000 epochs on the remote sensing hyperspectral dataset.

Table 1 presents the accuracy and precision of the degradation predictor for both hyperspectral datasets. The results show that the predictor achieves 100% accuracy and precision across all tasks, demonstrating MP-HSIR's effectiveness in supporting all trained blind restoration tasks.

## B. Dataset Details

This section provides a comprehensive overview of the 13 datasets used across 9 hyperspectral image (HSI) restoration tasks and real-world scenarios, as summarized in Table 2.

**ARAD [2].** The ARAD dataset, derived from the NTIRE 2022 Spectral Recovery Challenge, was collected using a

| Task                | Natural Scene |             | Remote Sensing |             |
|---------------------|---------------|-------------|----------------|-------------|
|                     | Accuracy ↑    | Precision ↑ | Accuracy ↑     | Precision ↑ |
| Gaussian Denoising  | 100.00        | 100.00      | 100.00         | 100.00      |
| Complex Denoising   | 100.00        | 100.00      | 100.00         | 100.00      |
| Gaussian Deblurring | 100.00        | 100.00      | 100.00         | 100.00      |
| Super-Resolution    | 100.00        | 100.00      | 100.00         | 100.00      |
| Inpainting          | 100.00        | 100.00      | 100.00         | 100.00      |
| Dehazing            | 100.00        | 100.00      | 100.00         | 100.00      |
| Band Completion     | 100.00        | 100.00      | 100.00         | 100.00      |

Table 1. Accuracy and precision results of the degradation predictor in degradation classification

Specim IQ hyperspectral camera. It consists of 1,000 images, with 900 allocated for training and 50 for testing.

**ICVL [1].** The ICVL dataset was obtained using a Specim PS Kappa DX4 hyperspectral camera combined with a rotating stage for spatial scanning. It contains 201 images, with 100 for training and 50 for testing, ensuring no scene overlap.

**Xiong'an [38].** The Xiong'an dataset was captured using an imaging spectrometer developed by the Chinese Academy of Sciences. Three central regions of size  $512 \times 512$  were randomly cropped for testing, while the remaining areas were used for training.

**WDC [44].** The Washington DC (WDC) dataset was captured by a Hydice sensor. A central region of size  $256 \times 256$  was selected for testing, with the remainder used for training.

**PaviaC [14].** The Pavia Center (PaviaC) dataset was acquired using a ROSIS sensor, following the same partitioning strategy as the WDC dataset.

**PaviaU [14].** The Pavia University (PaviaU) dataset was also collected using a ROSIS sensor, with the same partitioning strategy as WDC.

**Houston [36].** The Houston dataset was obtained using an ITRES CASI-1500 sensor, employing the same partitioning strategy as WDC.

**Chikusei [39].** The Chikusei dataset was captured using

\*Corresponding author

| Type                        | Dataset  | Sensor              | Wavelength (nm) | Channels | Size      | GSD (m) |
|-----------------------------|----------|---------------------|-----------------|----------|-----------|---------|
| <b>Natural HSI</b> s        | ARAD_1K  | Specim IQ           | 400–700         | 31       | 482×512   | /       |
|                             | ICVL     | Specim PS Kappa DX4 | 400–700         | 31       | 1392×1300 | /       |
| <b>Remote Sensing HSI</b> s | Xiong'an | Unknown             | 400–1000        | 256      | 3750×1580 | 0.5     |
|                             | WDC      | Hydice              | 400–2400        | 191      | 1208×307  | 5       |
|                             | PaviaC   | ROSIS               | 430–860         | 102      | 1096×715  | 1.3     |
|                             | PaviaU   | ROSIS               | 430–860         | 103      | 610×340   | 1.3     |
|                             | Houston  | ITRES CASI-1500     | 364–1046        | 144      | 349×1905  | 2.5     |
|                             | Chikusei | HH-VNIR-C           | 343–1018        | 128      | 2517×2335 | 2.5     |
|                             | Eagle    | AsiaEAGLE II        | 401–999         | 128      | 2082×1606 | 1       |
|                             | Berlin   | Unknown             | 455–2447        | 111      | 6805×1830 | 3.6     |
|                             | Urban    | Hydice              | 400–2500        | 210      | 307×307   | 2       |
|                             | APEX     | Unknown             | 350–2500        | 285      | 1000×1500 | 2       |
|                             | EO-1     | Hyperion            | 357–2567        | 242      | 3471×991  | 30      |

Table 2. Properties of 13 Natural Scene and Remote Sensing Hyperspectral Datasets.

an HH-VNIR-C sensor. Four  $512 \times 512$  regions were randomly cropped for testing, with the remaining areas used for training.

**Eagle [30].** The Eagle dataset was collected using an AsiaEAGLE II sensor, following the same partitioning strategy as WDC.

**Berlin [28].** The Berlin dataset utilizes only the HyMap image from the BerlinUrbGrad dataset. A  $512 \times 512$  central region was randomly cropped for testing, while the remaining data were used for training.

**Urban [3].** The Urban dataset, collected using a Hydice sensor, is specifically used for real-world denoising experiments.

**APEX [15].** The APEX dataset exhibits characteristics similar to the Urban dataset and is primarily used for fine-tuning pre-trained models.

**EO-1 [8].** The EO-1 dataset was captured by the Hyperion sensor. Ten scenes were collected for testing, with 67 invalid bands removed, retaining 175 valid bands for real-world dehazing experiments.

All datasets underwent min-max normalization, and training samples were uniformly cropped to  $64 \times 64$ .

### C. Detailed Experimental Setup

In this section, we provide a detailed description of the experimental settings for the 9 HSI restoration tasks.

**Gaussian Denoising.** Each image was corrupted by zero-mean independent and identically distributed (i.i.d.) Gaussian noise with sigma ranging from 30 to 70. For testing, sigma = 30, 50, and 70 were selected for evaluation.

**Complex Denoising.** Each image was corrupted with one of the following four noise scenarios:

1) Case 1 (*Non-i.i.d. Gaussian Noise*): All bands were corrupted by non-i.i.d. Gaussian noise with standard deviations randomly selected from 10 to 70.

2) Case 2 (*Gaussian Noise + Stripe Noise*): All bands were corrupted by non-i.i.d. Gaussian noise, and one-third of the bands were randomly selected to add column stripe noise with intensities ranging from 5% to 15%.

3) Case 3 (*Gaussian Noise + Deadline Noise*): The noise generation process was similar to Case 2, but stripe noise was replaced by deadline noise.

4) Case 4 (*Gaussian Noise + Impulse Noise*): All bands were corrupted by non-i.i.d. Gaussian noise, and one-third of the bands were randomly selected to add impulse noise with intensities ranging from 10% to 70%.

**Gaussian Deblurring.** An empirical formula was used to calculate the standard deviation  $\sigma$  based on the Gaussian kernel size  $K_S$ , formulated as:

$$\sigma = 0.3 \times \left( \frac{K_S - 1}{2} - 1 \right) + 0.8. \quad (2)$$

For natural hyperspectral datasets,  $K_S$  was set to 9, 15, and 21, while for remote sensing hyperspectral datasets,  $K_S$  was set to 7, 11, and 15.

**Super-Resolution.** Bicubic interpolation was used to downsample the images, with downscaling factors of 2, 4, and 8. To ensure that the input and output image sizes of the all-in-one model remained consistent, an unpooling operation was applied to resize the downsampled HSIs to their original dimensions.

**Inpainting.** Random masks with rates of 0.7, 0.8, and 0.9 were applied to each image for the inpainting task.

**Dehazing.** To realistically simulate haze contamination, the haze synthesis method from [11] was adopted. Specifi-

| Type          | Methods        | Gaussian Denoising (ICVL [1]) |                        |                        | Gaussian Denoising (ARAD [2]) |                        |                        | Gaussian Denoising (Xiong'an [38]) |                        |                        |
|---------------|----------------|-------------------------------|------------------------|------------------------|-------------------------------|------------------------|------------------------|------------------------------------|------------------------|------------------------|
|               |                | Sigma = 30                    | Sigma = 50             | Sigma = 70             | Sigma = 30                    | Sigma = 50             | Sigma = 70             | Sigma = 30                         | Sigma = 50             | Sigma = 70             |
|               |                | PSNR / SSIM $\uparrow$        | PSNR / SSIM $\uparrow$ | PSNR / SSIM $\uparrow$ | PSNR / SSIM $\uparrow$        | PSNR / SSIM $\uparrow$ | PSNR / SSIM $\uparrow$ | PSNR / SSIM $\uparrow$             | PSNR / SSIM $\uparrow$ | PSNR / SSIM $\uparrow$ |
| Task Specific | QRNN3D [35]    | 42.18 / 0.967                 | 39.70 / 0.942          | 38.09 / 0.933          | 41.67 / 0.967                 | 39.15 / 0.935          | 36.71 / 0.894          | 37.86 / 0.870                      | 36.03 / 0.825          | 34.29 / 0.792          |
|               | SST [19]       | 43.32 / 0.976                 | 41.09 / 0.952          | 39.51 / 0.949          | 43.02 / 0.972                 | 40.58 / 0.951          | 38.99 / 0.941          | 39.26 / 0.878                      | 37.34 / 0.848          | 35.99 / 0.824          |
|               | SERT [20]      | 43.53 / 0.978                 | 41.32 / 0.966          | 39.82 / 0.956          | 43.21 / 0.975                 | 40.84 / 0.959          | 39.21 / 0.945          | 39.54 / 0.885                      | 37.58 / 0.859          | 36.37 / 0.833          |
|               | LDERT [21]     | 44.12 / 0.982                 | 41.68 / 0.968          | 39.95 / 0.957          | 43.74 / 0.979                 | 41.35 / 0.966          | 39.32 / 0.950          | 39.92 / 0.889                      | 37.96 / 0.868          | 36.54 / 0.838          |
| All in One    | AirNet [18]    | 42.02 / 0.966                 | 39.68 / 0.942          | 37.59 / 0.923          | 41.39 / 0.963                 | 39.08 / 0.933          | 37.09 / 0.903          | 34.04 / 0.700                      | 31.61 / 0.665          | 30.17 / 0.639          |
|               | PromptIR [31]  | 42.40 / 0.971                 | 40.14 / 0.954          | 38.20 / 0.934          | 41.84 / 0.967                 | 39.55 / 0.947          | 37.67 / 0.921          | 34.90 / 0.715                      | 32.76 / 0.680          | 31.31 / 0.657          |
|               | PIP [22]       | 43.00 / 0.974                 | 40.69 / 0.958          | 38.94 / 0.941          | 42.33 / 0.970                 | 40.07 / 0.953          | 38.36 / 0.933          | 34.51 / 0.704                      | 32.43 / 0.671          | 30.98 / 0.647          |
|               | HAIR [4]       | 42.53 / 0.972                 | 40.23 / 0.957          | 38.78 / 0.939          | 42.03 / 0.968                 | 39.76 / 0.950          | 37.95 / 0.928          | 34.51 / 0.712                      | 32.22 / 0.675          | 30.89 / 0.650          |
|               | InstructIR [7] | 42.99 / 0.974                 | 40.84 / 0.960          | 39.23 / 0.946          | 42.21 / 0.970                 | 40.16 / 0.955          | 38.60 / 0.938          | 33.79 / 0.703                      | 31.47 / 0.662          | 29.96 / 0.633          |
|               | PromptHSI [17] | 42.61 / 0.976                 | 40.27 / 0.960          | 39.08 / 0.945          | 41.90 / 0.971                 | 39.84 / 0.959          | 38.37 / 0.938          | 39.54 / 0.902                      | 37.80 / 0.877          | 36.87 / 0.864          |
|               | MP-HSIR (Ours) | 43.62 / 0.977                 | 41.41 / 0.963          | 39.82 / 0.951          | 43.12 / 0.975                 | 40.88 / 0.960          | 39.28 / 0.946          | 40.55 / 0.922                      | 38.70 / 0.896          | 37.17 / 0.874          |

Table 3. [All-in-one] Quantitative comparison of all-in-one and state-of-the-art task-specific methods under different Gaussian noise levels on *Gaussian denoising* tasks. The best and second-best performances are highlighted in red and blue, respectively.

cally, 100 haze masks were extracted from the cirrus band of Landsat-8 OLI and superimposed onto the original image according to the wavelength ratio to generate haze-affected HSIs, modeled as:

$$I_i = J_i e^{\left(\frac{\lambda_1}{\lambda_i}\right)^\gamma \ln t_1} + A \left(1 - e^{\left(\frac{\lambda_1}{\lambda_i}\right)^\gamma \ln t_1}\right), \quad (3)$$

where  $I$  is the hazy HSI,  $J$  is the clear HSI,  $A$  is the global atmospheric light,  $\lambda$  is the wavelength, and  $\gamma$  is the spatial function, which is set to 1. The reference transmission map  $t_1$  is calculated from the cirrus band reflectance:

$$t_1 = 1 - \omega B_9, \quad (4)$$

where  $\omega$  is a weighting factor controlling the haze intensity, and  $B_9$  is the cirrus band reflectance. In the experiments,  $\omega$  was set to [0.5, 0.75, 1], corresponding to different levels of haze contamination.

**Band Completion.** A certain proportion of bands were discarded for each image, with discard rates of 0.1, 0.2, and 0.3. The experimental results were evaluated only on the missing bands.

**Motion Deblurring.** The pre-trained model was fine-tuned and tested on this task with a blur kernel radius of 15 and a blur angle of 45 degrees.

**Poisson Denoising.** The pre-trained model was directly tested on this task with a Poisson noise intensity scaling factor of 10.

## D. Visualization Results of Prompts

In Table 1, we present the similarity matrices of prompt vectors for different degradation types, comparing PromptIR [31], InstructIR [7], and the proposed method. PromptIR relies exclusively on visual prompts, InstructIR utilizes textual prompts for guidance, and the proposed method integrates

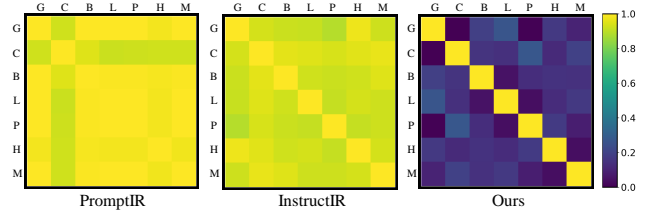

Figure 1. Similarity matrices of prompt vector for seven HSI restoration tasks, with task names as in manuscript.

text-visual synergistic prompts to enhance degradation modeling. As illustrated in the figure, both PromptIR and InstructIR struggle to effectively differentiate between various HSI degradation types, whereas our method demonstrates distinct separation for each individual task, highlighting its superior capability in handling diverse degradation scenarios.

## E. More Experimental Results

In this section, we present additional experimental results, including the results of more quantitative results, model efficiency, more results of ablation study, controllability analysis, and more visual comparisons.

### E.1. More Quantitative Results

In this section, we provide a detailed quantitative comparison for 7 all-in-one HSI restoration tasks. The experimental results across different degradation levels are systematically presented for each task, including Gaussian denoising in Table 3, complex denoising in Table 4, Gaussian deblurring in Table 5, super-resolution in Table 6, inpainting in Table 8, dehazing in Table 9, and band completion in Table 10.

In addition, we further evaluate the performance on real-world hyperspectral data using the no-reference metric QSFL [37]. The results on the Urban and EO-1 datasets are reported in Table 7, providing a more comprehensive assessment of generalization ability under practical conditions.

| Type          | Methods        | Complex Denoising (ICVL [1]) |               |               |               | Complex Denoising (ARAD [2]) |               |               |               | Complex Denoising (WDC [44]) |               |               |               |
|---------------|----------------|------------------------------|---------------|---------------|---------------|------------------------------|---------------|---------------|---------------|------------------------------|---------------|---------------|---------------|
|               |                | Case = 1                     | Case = 2      | Case = 3      | Case = 4      | Case = 1                     | Case = 2      | Case = 3      | Case = 4      | Case = 1                     | Case = 2      | Case = 3      | Case = 4      |
|               |                | PSNR / SSIM ↑                | PSNR / SSIM ↑ | PSNR / SSIM ↑ | PSNR / SSIM ↑ | PSNR / SSIM ↑                | PSNR / SSIM ↑ | PSNR / SSIM ↑ | PSNR / SSIM ↑ | PSNR / SSIM ↑                | PSNR / SSIM ↑ | PSNR / SSIM ↑ | PSNR / SSIM ↑ |
| Task Specific | QRNN3D [35]    | 42.24 / 0.969                | 41.98 / 0.968 | 41.62 / 0.968 | 40.55 / 0.960 | 41.74 / 0.966                | 41.55 / 0.965 | 41.38 / 0.964 | 39.76 / 0.946 | 31.98 / 0.885                | 31.77 / 0.882 | 31.48 / 0.878 | 28.05 / 0.822 |
|               | SST [19]       | 43.38 / 0.976                | 42.69 / 0.973 | 42.51 / 0.972 | 41.16 / 0.964 | 42.84 / 0.973                | 42.38 / 0.971 | 42.01 / 0.970 | 40.56 / 0.956 | 33.85 / 0.907                | 33.69 / 0.905 | 33.37 / 0.901 | 29.92 / 0.841 |
|               | SERT [20]      | 43.96 / 0.980                | 43.48 / 0.978 | 43.45 / 0.977 | 42.37 / 0.969 | 43.56 / 0.978                | 43.19 / 0.976 | 42.88 / 0.974 | 41.85 / 0.963 | 34.48 / 0.922                | 34.26 / 0.920 | 33.98 / 0.915 | 30.53 / 0.854 |
|               | LDERT [21]     | 44.04 / 0.981                | 43.57 / 0.979 | 43.55 / 0.979 | 42.51 / 0.971 | 43.67 / 0.979                | 43.33 / 0.977 | 43.06 / 0.974 | 42.02 / 0.965 | 34.65 / 0.923                | 34.42 / 0.920 | 34.13 / 0.917 | 30.74 / 0.856 |
| All in One    | AirNet [18]    | 42.11 / 0.968                | 41.24 / 0.964 | 40.89 / 0.961 | 38.49 / 0.942 | 41.62 / 0.965                | 40.83 / 0.959 | 40.31 / 0.957 | 37.59 / 0.905 | 29.02 / 0.752                | 28.93 / 0.744 | 28.67 / 0.740 | 25.67 / 0.667 |
|               | PromptIR [31]  | 42.76 / 0.973                | 41.93 / 0.969 | 41.43 / 0.969 | 39.04 / 0.947 | 42.26 / 0.969                | 41.54 / 0.964 | 40.90 / 0.964 | 38.12 / 0.919 | 29.84 / 0.761                | 29.71 / 0.754 | 29.39 / 0.747 | 26.38 / 0.676 |
|               | PIP [22]       | 42.96 / 0.974                | 42.13 / 0.970 | 41.38 / 0.969 | 40.19 / 0.959 | 42.39 / 0.971                | 41.71 / 0.966 | 41.11 / 0.966 | 39.45 / 0.943 | 29.57 / 0.751                | 29.31 / 0.745 | 29.17 / 0.740 | 25.95 / 0.658 |
|               | HAIR [4]       | 41.78 / 0.965                | 41.47 / 0.965 | 40.68 / 0.958 | 38.58 / 0.943 | 41.19 / 0.959                | 40.95 / 0.961 | 40.53 / 0.959 | 37.92 / 0.909 | 29.38 / 0.756                | 29.22 / 0.750 | 28.73 / 0.744 | 25.40 / 0.664 |
|               | InstructIR [7] | 41.29 / 0.963                | 40.89 / 0.961 | 39.94 / 0.958 | 38.46 / 0.945 | 40.72 / 0.960                | 40.38 / 0.957 | 39.94 / 0.956 | 38.21 / 0.934 | 28.66 / 0.736                | 28.47 / 0.730 | 28.19 / 0.725 | 24.63 / 0.637 |
|               | PromptHSI [17] | 40.61 / 0.967                | 40.36 / 0.965 | 39.30 / 0.960 | 36.27 / 0.927 | 40.22 / 0.951                | 39.98 / 0.955 | 39.42 / 0.953 | 35.39 / 0.884 | 34.93 / 0.931                | 34.87 / 0.930 | 34.49 / 0.928 | 30.78 / 0.857 |
|               | MP-HSIR (Ours) | 43.07 / 0.975                | 42.46 / 0.972 | 42.20 / 0.972 | 41.42 / 0.966 | 42.74 / 0.973                | 42.32 / 0.971 | 41.93 / 0.970 | 40.98 / 0.960 | 35.21 / 0.933                | 34.99 / 0.931 | 34.72 / 0.928 | 31.36 / 0.880 |

Table 4. [All-in-one] Quantitative comparison of all-in-one and state-of-the-art task-specific methods under different cases on *Complex denoising* tasks. The best and second-best performances are highlighted in red and blue, respectively.

| Type          | Methods          | Gaussian Deblurring (ICVL [1]) |               |               | Gaussian Deblurring (PaviaC [14]) |               |               | Gaussian Deblurring (Eagle [30]) |               |               |
|---------------|------------------|--------------------------------|---------------|---------------|-----------------------------------|---------------|---------------|----------------------------------|---------------|---------------|
|               |                  | Radius = 9                     | Radius = 15   | Radius = 21   | Radius = 7                        | Radius = 11   | Radius = 15   | Radius = 7                       | Radius = 11   | Radius = 15   |
|               |                  | PSNR / SSIM ↑                  | PSNR / SSIM ↑ | PSNR / SSIM ↑ | PSNR / SSIM ↑                     | PSNR / SSIM ↑ | PSNR / SSIM ↑ | PSNR / SSIM ↑                    | PSNR / SSIM ↑ | PSNR / SSIM ↑ |
| Task Specific | Stripformer [33] | 49.21 / 0.994                  | 45.85 / 0.989 | 43.04 / 0.980 | 38.73 / 0.934                     | 36.95 / 0.914 | 35.72 / 0.891 | 44.68 / 0.974                    | 41.37 / 0.958 | 39.83 / 0.942 |
|               | FFTformer [16]   | 49.83 / 0.994                  | 46.43 / 0.989 | 43.69 / 0.981 | 39.82 / 0.942                     | 37.63 / 0.919 | 36.44 / 0.901 | 45.51 / 0.980                    | 42.18 / 0.962 | 40.59 / 0.944 |
|               | LoFormer [26]    | 50.35 / 0.995                  | 46.94 / 0.991 | 44.15 / 0.983 | 39.54 / 0.941                     | 37.41 / 0.918 | 36.21 / 0.892 | 45.32 / 0.979                    | 42.03 / 0.961 | 40.42 / 0.946 |
|               | MLWNet [9]       | 50.68 / 0.996                  | 47.54 / 0.991 | 44.76 / 0.983 | 40.85 / 0.949                     | 38.92 / 0.929 | 37.28 / 0.901 | 46.61 / 0.983                    | 43.68 / 0.969 | 41.83 / 0.955 |
| All in One    | AirNet [18]      | 50.64 / 0.995                  | 47.10 / 0.991 | 43.89 / 0.982 | 39.45 / 0.940                     | 37.76 / 0.921 | 36.08 / 0.893 | 44.83 / 0.977                    | 42.32 / 0.966 | 40.11 / 0.946 |
|               | PromptIR [31]    | 51.00 / 0.996                  | 47.70 / 0.992 | 44.32 / 0.983 | 40.41 / 0.948                     | 38.62 / 0.929 | 37.13 / 0.904 | 46.17 / 0.981                    | 43.45 / 0.968 | 41.60 / 0.955 |
|               | PIP [22]         | 51.05 / 0.996                  | 47.29 / 0.991 | 44.21 / 0.983 | 40.31 / 0.944                     | 38.51 / 0.926 | 36.73 / 0.902 | 45.90 / 0.982                    | 42.75 / 0.968 | 40.86 / 0.951 |
|               | HAIR [4]         | 49.43 / 0.994                  | 46.06 / 0.989 | 43.87 / 0.981 | 39.97 / 0.943                     | 38.18 / 0.923 | 35.64 / 0.891 | 45.14 / 0.979                    | 42.69 / 0.966 | 40.48 / 0.947 |
|               | InstructIR [7]   | 24.19 / 0.533                  | 33.44 / 0.878 | 44.51 / 0.983 | 19.66 / 0.329                     | 25.12 / 0.583 | 36.32 / 0.894 | 23.35 / 0.477                    | 34.05 / 0.872 | 40.64 / 0.949 |
|               | PromptHSI [17]   | 25.16 / 0.619                  | 30.89 / 0.852 | 41.52 / 0.980 | 38.73 / 0.936                     | 36.63 / 0.913 | 34.84 / 0.888 | 42.45 / 0.972                    | 39.34 / 0.952 | 37.46 / 0.938 |
|               | MP-HSIR (Ours)   | 51.53 / 0.996                  | 47.60 / 0.992 | 45.07 / 0.982 | 40.85 / 0.949                     | 38.95 / 0.928 | 37.19 / 0.905 | 46.26 / 0.982                    | 43.54 / 0.969 | 41.36 / 0.952 |

Table 5. [All-in-one] Quantitative comparison of all-in-one and state-of-the-art task-specific methods under different blur kernel radius on *Gaussian deblurring* tasks. The best and second-best performances are highlighted in red and blue, respectively.

| Type          | Methods         | Super-Resolution (ARAD [2]) |               |               | Super-Resolution (PaviaU [14]) |               |               | Super-Resolution (Houston [36]) |               |               |
|---------------|-----------------|-----------------------------|---------------|---------------|--------------------------------|---------------|---------------|---------------------------------|---------------|---------------|
|               |                 | Scale = 2                   | Scale = 4     | Scale = 8     | Scale = 2                      | Scale = 4     | Scale = 8     | Scale = 2                       | Scale = 4     | Scale = 8     |
|               |                 | PSNR / SSIM ↑               | PSNR / SSIM ↑ | PSNR / SSIM ↑ | PSNR / SSIM ↑                  | PSNR / SSIM ↑ | PSNR / SSIM ↑ | PSNR / SSIM ↑                   | PSNR / SSIM ↑ | PSNR / SSIM ↑ |
| Task Specific | SNLSR [13]      | 43.93 / 0.980               | 34.56 / 0.902 | 29.67 / 0.813 | 34.58 / 0.869                  | 29.85 / 0.719 | 27.23 / 0.601 | 34.91 / 0.908                   | 31.33 / 0.782 | 28.86 / 0.671 |
|               | MAN [34]        | 44.81 / 0.985               | 35.35 / 0.912 | 30.49 / 0.830 | 34.92 / 0.872                  | 30.26 / 0.723 | 27.59 / 0.604 | 35.26 / 0.911                   | 31.68 / 0.785 | 29.15 / 0.677 |
|               | ESSAformer [41] | 45.32 / 0.988               | 36.02 / 0.927 | 30.85 / 0.838 | 35.47 / 0.879                  | 30.60 / 0.728 | 27.96 / 0.606 | 35.60 / 0.913                   | 31.94 / 0.787 | 29.57 / 0.679 |
|               | SRFormer [43]   | 45.84 / 0.989               | 36.73 / 0.931 | 31.48 / 0.845 | 35.92 / 0.887                  | 31.08 / 0.745 | 28.41 / 0.620 | 36.15 / 0.920                   | 32.44 / 0.805 | 29.81 / 0.684 |
| All in One    | AirNet [18]     | 44.82 / 0.985               | 35.26 / 0.919 | 30.12 / 0.828 | 34.85 / 0.871                  | 30.19 / 0.724 | 27.76 / 0.609 | 35.22 / 0.911                   | 31.65 / 0.786 | 29.13 / 0.676 |
|               | PromptIR [31]   | 45.33 / 0.988               | 36.00 / 0.927 | 30.77 / 0.838 | 35.57 / 0.883                  | 30.81 / 0.735 | 28.20 / 0.619 | 35.96 / 0.915                   | 32.38 / 0.798 | 29.85 / 0.684 |
|               | PIP [22]        | 46.01 / 0.989               | 37.34 / 0.939 | 31.73 / 0.853 | 35.71 / 0.885                  | 31.02 / 0.744 | 28.20 / 0.618 | 36.10 / 0.917                   | 32.55 / 0.806 | 30.02 / 0.692 |
|               | HAIR [4]        | 43.77 / 0.984               | 35.89 / 0.924 | 30.87 / 0.836 | 35.49 / 0.882                  | 30.79 / 0.736 | 28.13 / 0.616 | 35.81 / 0.913                   | 32.17 / 0.795 | 29.64 / 0.680 |
|               | InstructIR [7]  | 43.47 / 0.984               | 35.46 / 0.921 | 30.61 / 0.834 | 35.25 / 0.879                  | 30.71 / 0.732 | 28.05 / 0.613 | 35.68 / 0.909                   | 32.15 / 0.789 | 29.73 / 0.681 |
|               | PromptHSI [17]  | 40.25 / 0.975               | 35.41 / 0.931 | 29.35 / 0.806 | 34.84 / 0.871                  | 30.13 / 0.722 | 27.27 / 0.602 | 35.34 / 0.912                   | 31.62 / 0.778 | 28.59 / 0.635 |
|               | MP-HSIR (Ours)  | 46.72 / 0.991               | 36.88 / 0.939 | 31.14 / 0.843 | 36.27 / 0.894                  | 31.26 / 0.757 | 28.38 / 0.630 | 36.57 / 0.926                   | 32.68 / 0.813 | 29.92 / 0.690 |

Table 6. [All-in-one] Quantitative comparison of all-in-one and state-of-the-art task-specific methods under different downsampling scales on *Super-Resolution* tasks. The best and second-best performances are highlighted in red and blue, respectively.

| Dataset | PromptIR | InstructIR | PromptHSI | MP-HSIR |
|---------|----------|------------|-----------|---------|
| Urban   | 14.95    | 15.56      | 12.34     | 11.42   |
| EO-1    | 17.99    | 19.71      | 18.13     | 16.54   |

Table 7. No-reference quality assessment on real datasets.

## E.2. Model Efficiency

In this section, we present the parameter counts and computational costs of the all-in-one models for both natural scene and remote sensing hyperspectral datasets. Notably, the net-

work width for remote sensing datasets is 1.5 times greater than that for natural scene datasets across all models. As demonstrated in Table 11, our method achieves a lower parameter count while maintaining competitive computational efficiency.

Furthermore, to evaluate the practical inference performance, Table 12 reports the average inference time of each method on remote sensing datasets. Our method maintains a favorable trade-off between efficiency and accuracy, demonstrating its suitability for large-scale deployment.

| Type          | Methods        | <i>Inpainting (ICVL [1])</i> |                        |                        | <i>Inpainting (Chikusei [39])</i> |                        |                        |
|---------------|----------------|------------------------------|------------------------|------------------------|-----------------------------------|------------------------|------------------------|
|               |                | Rate = 0.7                   | Rate = 0.8             | Rate = 0.9             | Rate = 0.7                        | Rate = 0.8             | Rate = 0.9             |
|               |                | PSNR / SSIM $\uparrow$       | PSNR / SSIM $\uparrow$ | PSNR / SSIM $\uparrow$ | PSNR / SSIM $\uparrow$            | PSNR / SSIM $\uparrow$ | PSNR / SSIM $\uparrow$ |
| Task Specific | NAFNet [5]     | 45.03 / 0.989                | 44.65 / 0.988          | 43.50 / 0.985          | 40.34 / 0.952                     | 40.15 / 0.955          | 38.97 / 0.952          |
|               | Restormer [40] | 46.51 / 0.991                | 46.00 / 0.991          | 44.85 / 0.988          | 36.52 / 0.902                     | 36.34 / 0.892          | 36.13 / 0.903          |
|               | DDS2M [27]     | 45.41 / 0.989                | 43.34 / 0.983          | 37.80 / 0.935          | 36.77 / 0.906                     | 35.23 / 0.901          | 32.83 / 0.854          |
|               | HIR-Diff [29]  | 41.82 / 0.973                | 38.87 / 0.949          | 36.04 / 0.924          | 38.59 / 0.923                     | 37.96 / 0.920          | 36.41 / 0.904          |
| All in One    | AirNet [18]    | 43.10 / 0.983                | 43.06 / 0.983          | 41.65 / 0.977          | 38.12 / 0.919                     | 37.86 / 0.921          | 36.39 / 0.918          |
|               | PromptIR [31]  | 46.96 / 0.992                | 46.93 / 0.992          | 45.24 / 0.988          | 38.86 / 0.925                     | 38.30 / 0.931          | 37.05 / 0.934          |
|               | PIP [22]       | 44.37 / 0.985                | 43.47 / 0.983          | 42.26 / 0.978          | 38.74 / 0.922                     | 38.58 / 0.930          | 37.98 / 0.938          |
|               | HAIR [4]       | 44.83 / 0.983                | 44.30 / 0.983          | 42.92 / 0.981          | 38.43 / 0.921                     | 38.28 / 0.928          | 37.43 / 0.932          |
|               | InstructIR [7] | 44.85 / 0.989                | 44.29 / 0.987          | 43.08 / 0.983          | 36.30 / 0.904                     | 36.18 / 0.908          | 35.84 / 0.909          |
|               | PromptHSI [17] | 42.83 / 0.983                | 41.72 / 0.976          | 39.89 / 0.956          | 38.99 / 0.966                     | 37.64 / 0.952          | 35.35 / 0.920          |
|               | MP-HSIR (Ours) | 53.06 / 0.997                | 51.94 / 0.996          | 49.60 / 0.994          | 44.75 / 0.981                     | 44.06 / 0.981          | 42.08 / 0.975          |

Table 8. **[All-in-one]** Quantitative comparison of all-in-one and state-of-the-art task-specific methods under different mask rates on *Inpainting* tasks. The best and second-best performances are highlighted in red and blue, respectively.

| Type          | Methods        | <i>Dehazing (PaviaU [14])</i> |                        |                        | <i>Dehazing (Eagle [30])</i> |                        |                        |
|---------------|----------------|-------------------------------|------------------------|------------------------|------------------------------|------------------------|------------------------|
|               |                | Omega = 0.5                   | Omega = 0.75           | Omega = 1.0            | Omega = 0.5                  | Omega = 0.75           | Omega = 1.0            |
|               |                | PSNR / SSIM $\uparrow$        | PSNR / SSIM $\uparrow$ | PSNR / SSIM $\uparrow$ | PSNR / SSIM $\uparrow$       | PSNR / SSIM $\uparrow$ | PSNR / SSIM $\uparrow$ |
| Task Specific | SGNet [25]     | 36.52 / 0.974                 | 34.10 / 0.964          | 32.22 / 0.949          | 39.43 / 0.989                | 37.33 / 0.976          | 34.90 / 0.962          |
|               | SCANet [12]    | 39.01 / 0.986                 | 36.54 / 0.978          | 34.21 / 0.969          | 41.92 / 0.991                | 39.68 / 0.987          | 37.31 / 0.978          |
|               | MB-Taylor [32] | 40.51 / 0.991                 | 38.03 / 0.984          | 35.44 / 0.975          | 43.76 / 0.995                | 40.97 / 0.992          | 38.36 / 0.986          |
|               | DCMPNet [42]   | 39.63 / 0.993                 | 37.14 / 0.985          | 34.82 / 0.976          | 42.93 / 0.995                | 40.15 / 0.991          | 37.64 / 0.985          |
| All in One    | AirNet [18]    | 38.61 / 0.982                 | 35.65 / 0.967          | 32.51 / 0.947          | 41.88 / 0.991                | 38.68 / 0.982          | 35.92 / 0.969          |
|               | PromptIR [31]  | 40.34 / 0.991                 | 37.43 / 0.983          | 34.47 / 0.971          | 43.55 / 0.995                | 40.69 / 0.992          | 37.94 / 0.988          |
|               | PIP [22]       | 40.30 / 0.991                 | 37.64 / 0.983          | 34.93 / 0.971          | 43.21 / 0.994                | 40.95 / 0.991          | 38.07 / 0.985          |
|               | HAIR [4]       | 39.47 / 0.989                 | 36.79 / 0.980          | 34.02 / 0.965          | 43.38 / 0.995                | 40.54 / 0.992          | 38.67 / 0.988          |
|               | InstructIR [7] | 38.24 / 0.986                 | 34.57 / 0.974          | 31.36 / 0.954          | 40.90 / 0.991                | 38.07 / 0.985          | 33.99 / 0.971          |
|               | PromptHSI [17] | 38.62 / 0.982                 | 36.48 / 0.975          | 35.22 / 0.964          | 40.88 / 0.986                | 40.49 / 0.984          | 37.98 / 0.981          |
|               | MP-HSIR (Ours) | 42.64 / 0.993                 | 39.46 / 0.988          | 36.68 / 0.978          | 45.66 / 0.997                | 42.24 / 0.995          | 39.34 / 0.992          |

Table 9. **[All-in-one]** Quantitative comparison of all-in-one and state-of-the-art task-specific methods under different haze levels on *Dehazing* tasks. The best and second-best performances are highlighted in red and blue, respectively.

| Type          | Methods        | <i>Band Completion (ARAD [2])</i> |                        |                        | <i>Band Completion (Berlin [28])</i> |                        |                        |
|---------------|----------------|-----------------------------------|------------------------|------------------------|--------------------------------------|------------------------|------------------------|
|               |                | Rate = 0.1                        | Rate = 0.2             | Rate = 0.3             | Rate = 0.1                           | Rate = 0.2             | Rate = 0.3             |
|               |                | PSNR / SSIM $\uparrow$            | PSNR / SSIM $\uparrow$ | PSNR / SSIM $\uparrow$ | PSNR / SSIM $\uparrow$               | PSNR / SSIM $\uparrow$ | PSNR / SSIM $\uparrow$ |
| Task Specific | NAFNet [5]     | 47.82 / 0.996                     | 47.02 / 0.995          | 46.29 / 0.994          | 39.71 / 0.972                        | 37.51 / 0.874          | 37.84 / 0.875          |
|               | Restormer [40] | 49.24 / 0.997                     | 48.29 / 0.995          | 47.49 / 0.993          | 34.98 / 0.605                        | 35.24 / 0.606          | 35.00 / 0.607          |
|               | SwinIR [23]    | 50.95 / 0.997                     | 49.80 / 0.995          | 48.49 / 0.993          | 36.88 / 0.950                        | 34.69 / 0.855          | 34.78 / 0.854          |
|               | MambaIR [10]   | 51.46 / 0.998                     | 50.32 / 0.995          | 49.01 / 0.993          | 37.54 / 0.953                        | 35.38 / 0.857          | 35.43 / 0.855          |
| All in One    | AirNet [18]    | 46.14 / 0.994                     | 45.21 / 0.992          | 44.46 / 0.990          | 37.62 / 0.691                        | 35.26 / 0.586          | 34.86 / 0.595          |
|               | PromptIR [31]  | 47.68 / 0.996                     | 46.71 / 0.994          | 45.41 / 0.992          | 42.81 / 0.707                        | 39.55 / 0.910          | 39.00 / 0.640          |
|               | PIP [22]       | 48.35 / 0.995                     | 47.37 / 0.994          | 46.37 / 0.991          | 38.60 / 0.706                        | 36.58 / 0.657          | 36.43 / 0.641          |
|               | HAIR [4]       | 46.27 / 0.994                     | 44.92 / 0.992          | 44.04 / 0.990          | 40.04 / 0.705                        | 36.54 / 0.607          | 37.45 / 0.639          |
|               | InstructIR [7] | 52.66 / 0.998                     | 51.37 / 0.997          | 49.90 / 0.996          | 36.17 / 0.606                        | 35.33 / 0.559          | 36.40 / 0.576          |
|               | PromptHSI [17] | 49.05 / 0.996                     | 47.09 / 0.993          | 45.89 / 0.992          | 47.11 / 0.997                        | 43.14 / 0.973          | 39.82 / 0.956          |
|               | MP-HSIR (Ours) | 57.83 / 0.999                     | 56.61 / 0.999          | 54.99 / 0.998          | 52.14 / 0.999                        | 49.20 / 0.997          | 47.26 / 0.965          |

Table 10. **[All-in-one]** Quantitative comparison of all-in-one and state-of-the-art task-specific methods under different mask rates on *Band Completion* tasks. The best and second-best performances are highlighted in red and blue, respectively.



| Methods        | Natural Scene |           | Remote Sensing |           |
|----------------|---------------|-----------|----------------|-----------|
|                | Params (M)    | FLOPS (G) | Params (M)     | FLOPS (G) |
| AirNet [18]    | 5.82          | 19.04     | 12.23          | 43.79     |
| PromptIR [31]  | 33.00         | 10.03     | 72.60          | 22.21     |
| PIP [22]       | 27.80         | 10.66     | 58.26          | 22.08     |
| HAIR [4]       | 7.68          | 2.72      | 17.28          | 6.46      |
| InstructIR [7] | 68.82         | 2.81      | 154.03         | 6.57      |
| PromptHSI [17] | 25.90         | 10.10     | 50.89          | 21.91     |
| MP-HSIR (Ours) | 13.88         | 14.40     | 30.91          | 32.74     |

Table 11. Model complexity comparisons

| Metric             | PromptIR | InstructIR   | PromptHSI | MP-HSIR      |
|--------------------|----------|--------------|-----------|--------------|
| Inference Time (s) | 0.087    | <b>0.065</b> | 0.282     | <u>0.083</u> |

Table 12. Inference time for remote sensing scenes (64×64×100).

| Method                                                      | PSNR ↑       | SSIM ↑       | Params (M) |
|-------------------------------------------------------------|--------------|--------------|------------|
| Baseline (Only Spatial SA)                                  | 33.78        | 0.782        | 20.93      |
| + Textual Prompt $P_T$                                      | 34.53        | 0.807        | 21.51      |
| + Visual Prompt $P_V$                                       | 34.47        | 0.805        | 23.68      |
| + Textual Prompt $P_T$ + Visual Prompt $P_V$                | 34.92        | 0.822        | 24.26      |
| + Global Spectral SA + $P_T$ + $P_V$                        | 35.20        | 0.835        | 30.07      |
| + Local Spectral SA + $P_T$ + $P_V$                         | 35.82        | 0.846        | 24.43      |
| + Local Spectral SA + $P_T$ + $P_V$ + Spectral Prompt $P_S$ | 36.67        | 0.863        | 25.10      |
| Full Model                                                  | <b>37.17</b> | <b>0.874</b> | 30.91      |

Table 13. Ablation study to verify the effectiveness of modules on Xiong'an dataset in *Gaussian denoising* task with sigma = 70.

| Method                                                      | PSNR ↑       | SSIM ↑       | Params (M) |
|-------------------------------------------------------------|--------------|--------------|------------|
| Baseline (Only Spatial SA)                                  | 30.10        | 0.788        | 20.93      |
| + Textual Prompt $P_T$                                      | 37.64        | 0.928        | 21.51      |
| + Visual Prompt $P_V$                                       | 37.42        | 0.925        | 23.68      |
| + Textual Prompt $P_T$ + Visual Prompt $P_V$                | 38.91        | 0.942        | 24.26      |
| + Global Spectral SA + $P_T$ + $P_V$                        | 39.20        | 0.944        | 30.07      |
| + Local Spectral SA + $P_T$ + $P_V$                         | 39.79        | 0.948        | 24.43      |
| + Local Spectral SA + $P_T$ + $P_V$ + Spectral Prompt $P_S$ | 40.51        | 0.950        | 25.10      |
| Full Model                                                  | <b>41.36</b> | <b>0.952</b> | 30.91      |

Table 14. Ablation study to verify the effectiveness of modules on Eagle dataset in *Gaussian deblurring* task with radius = 15.

### E.3. More results of Ablation Study

In this section, we present ablation studies on the textual prompts  $P_T$ , learnable visual prompts  $P_V$ , global spectral self-attention, local spectral self-attention, and spectral prompts  $P_S$  across multiple tasks, as shown in Tables 13, 14, and 15. Overall, the addition of each module progressively improves the two accuracy metrics across all tasks.

### E.4. Controllable Results

In this section, we demonstrate the controllable restoration capability of the proposed method. Specifically, we conduct controlled restoration tasks under two composite degradation scenarios: Gaussian noise with Gaussian blur and complex noise with Gaussian blur, aiming to remove noise while

| Method                                                      | PSNR ↑       | SSIM ↑       | Params (M) |
|-------------------------------------------------------------|--------------|--------------|------------|
| Baseline (Only Spatial SA)                                  | 32.52        | 0.967        | 20.93      |
| + Textual Prompt $P_T$                                      | 34.24        | 0.965        | 21.51      |
| + Visual Prompt $P_V$                                       | 34.13        | 0.964        | 23.68      |
| + Textual Prompt $P_T$ + Visual Prompt $P_V$                | 34.92        | 0.969        | 24.26      |
| + Global Spectral SA + $P_T$ + $P_V$                        | 35.53        | 0.973        | 30.07      |
| + Local Spectral SA + $P_T$ + $P_V$                         | 35.64        | 0.974        | 24.43      |
| + Local Spectral SA + $P_T$ + $P_V$ + Spectral Prompt $P_S$ | 36.13        | 0.976        | 25.10      |
| Full Model                                                  | <b>36.68</b> | <b>0.978</b> | 30.91      |

Table 15. Ablation study to verify the effectiveness of modules on PaviaU dataset in *Dehazing* task with Omega = 1.0.

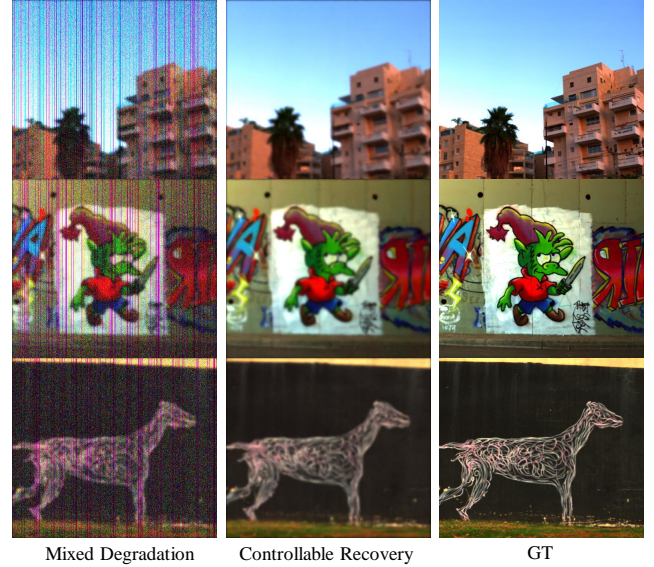

Figure 2. Controllable Reconstruction: Removing *Gaussian* from *Gaussian Noise* + *Gaussian Blur* Degradation.

preserving blur. As illustrated in Figures 2 and 3, our method can precisely remove specific degradation types through accurate guidance from textual prompts, highlighting its controllability and interpretability.

Building on this controllable restoration paradigm, we further explore sequential degradation removal, where multiple degradations are addressed step by step under prompt guidance. As shown in Figure 4, our method achieves superior results in this more challenging setting, outperforming other approaches in both visual quality and flexibility.

### E.5. More Visual Results

In this section, we present further visual results for each task, including all-in-one experiments, generalization testing, and real-world scenarios. As shown in Figures 5, 6, 7, and 8, the visualization results indicate that our method achieves the best performance in restoring texture details and structural features.

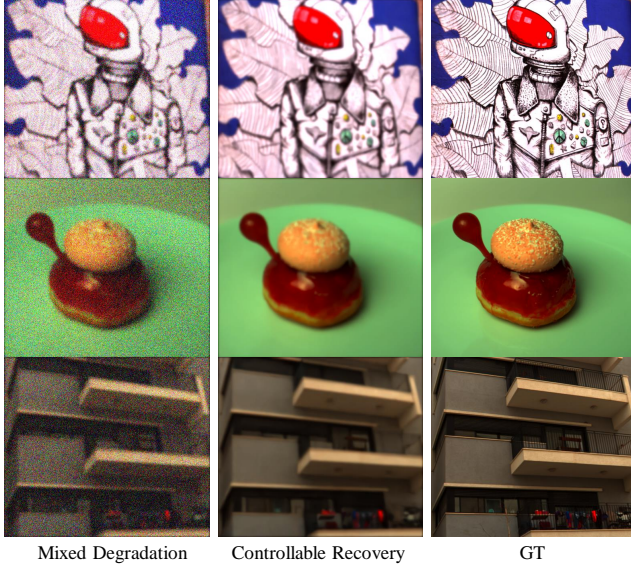

Figure 3. Controllable Reconstruction: Removing **Complex Noise** from **Complex Noise + Gaussian Blur** Degradation.

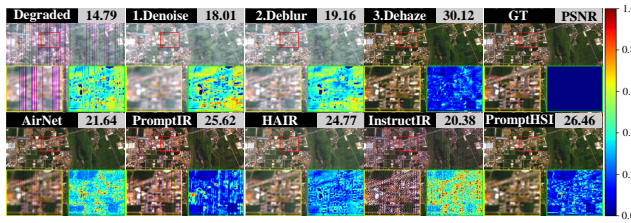

Figure 4. Progressive results (ours) and final results (others).

## References

- [1] Boaz Arad and Ohad Ben-Shahar. Sparse recovery of hyperspectral signal from natural rgb images. In *Computer Vision—ECCV 2016: 14th European Conference, Amsterdam, the Netherlands, October 11–14, 2016, Proceedings, Part VII 14*, pages 19–34. Springer, 2016. 1, 3, 4, 5
- [2] Boaz Arad, Radu Timofte, Rony Yahel, Nimrod Morag, Amir Bernat, Yuanhao Cai, Jing Lin, Zudi Lin, Haoqian Wang, Yulun Zhang, et al. Ntire 2022 spectral recovery challenge and data set. In *Proceedings of the IEEE/CVF Conference on Computer Vision and Pattern Recognition*, pages 863–881, 2022. 1, 3, 4, 5
- [3] M. F. Baumgardner, L. L. Biehl, and D. A. Landgrebe. 220-band aviris hyperspectral image data set: June 12, 1992 indian pine test site 3, 2015. Available: <https://purrr.purdue.edu/publications/1947/1>. 2
- [4] Jin Cao, Yi Cao, Li Pang, Deyu Meng, and Xiangyong Cao. Hair: Hypernetworks-based all-in-one image restoration. *arXiv preprint arXiv:2408.08091*, 2024. 3, 4, 5, 6
- [5] Liangyu Chen, Xiaojie Chu, Xiangyu Zhang, and Jian Sun. Simple baselines for image restoration. In *European Conference on Computer Vision*, pages 17–33. Springer, 2022. 5
- [6] Lu Chi, Borui Jiang, and Yadong Mu. Fast fourier convolution. *Advances in Neural Information Processing Systems*, 33:4479–4488, 2020. 1
- [7] Marcos V Conde, Gregor Geigle, and Radu Timofte. Instructir: High-quality image restoration following human instructions. In *European Conference on Computer Vision*, pages 1–21. Springer, 2024. 3, 4, 5, 6
- [8] Mark A Folkman, Jay Pearlman, Lushalan B Liao, and Peter J Jarecke. Eo-1/hyperion hyperspectral imager design, development, characterization, and calibration. *Hyperspectral Remote Sensing of the Land and Atmosphere*, 4151:40–51, 2001. 2
- [9] Xin Gao, Tianheng Qiu, Xinyu Zhang, Hanlin Bai, Kang Liu, Xuan Huang, Hu Wei, Guoying Zhang, and Huaping Liu. Efficient multi-scale network with learnable discrete wavelet transform for blind motion deblurring. In *Proceedings of the IEEE/CVF Conference on Computer Vision and Pattern Recognition*, pages 2733–2742, 2024. 4
- [10] Hang Guo, Jinmin Li, Tao Dai, Zhihao Ouyang, Xudong Ren, and Shu-Tao Xia. Mambair: A simple baseline for image restoration with state-space model. In *European Conference on Computer Vision*, pages 222–241. Springer, 2024. 5
- [11] Jianhua Guo, Jingyu Yang, Huanjing Yue, Hai Tan, Chunping Hou, and Kun Li. Rsdehazenet: Dehazing network with channel refinement for multispectral remote sensing images. *IEEE Transactions on Geoscience and Remote Sensing*, 59 (3):2535–2549, 2020. 2
- [12] Yu Guo, Yuan Gao, Wen Liu, Yuxu Lu, Jingxiang Qu, Shengfeng He, and Wenqi Ren. Scanet: Self-paced semi-curricular attention network for non-homogeneous image dehazing. In *Proceedings of the IEEE/CVF Conference on Computer Vision and Pattern Recognition*, pages 1885–1894, 2023. 5
- [13] Qian Hu, Xinya Wang, Junjun Jiang, Xiao-Ping Zhang, and Jiayi Ma. Exploring the spectral prior for hyperspectral image super-resolution. *IEEE Transactions on Image Processing*, 2024. 4
- [14] Xin Huang and Liangpei Zhang. A comparative study of spatial approaches for urban mapping using hyperspectral rosis images over pavia city, northern italy. *International Journal of Remote Sensing*, 30(12):3205–3221, 2009. 1, 4, 5
- [15] Klaus I Itten, Francesco Dell’Endice, Andreas Hueni, Mathias Kneubühler, Daniel Schlöpfer, Daniel Odermatt, Felix Seidel, Silvia Huber, Jürg Schopfer, Tobias Kellenberger, et al. Apex-the hyperspectral esa airborne prism experiment. *Sensors*, 8 (10):6235–6259, 2008. 2
- [16] Lingshun Kong, Jiangxin Dong, Jianjun Ge, Mingqiang Li, and Jinshan Pan. Efficient frequency domain-based transformers for high-quality image deblurring. In *Proceedings of the IEEE/CVF Conference on Computer Vision and Pattern Recognition*, pages 5886–5895, 2023. 4
- [17] Chia-Ming Lee, Ching-Heng Cheng, Yu-Fan Lin, Yi-Ching Cheng, Wo-Ting Liao, Chih-Chung Hsu, Fu-En Yang, and Yu-Chiang Frank Wang. Prompthsi: Universal hyperspectral image restoration framework for composite degradation. *arXiv preprint arXiv:2411.15922*, 2024. 3, 4, 5, 6
- [18] Boyun Li, Xiao Liu, Peng Hu, Zhongqin Wu, Jiancheng Lv, and Xi Peng. All-in-one image restoration for unknown



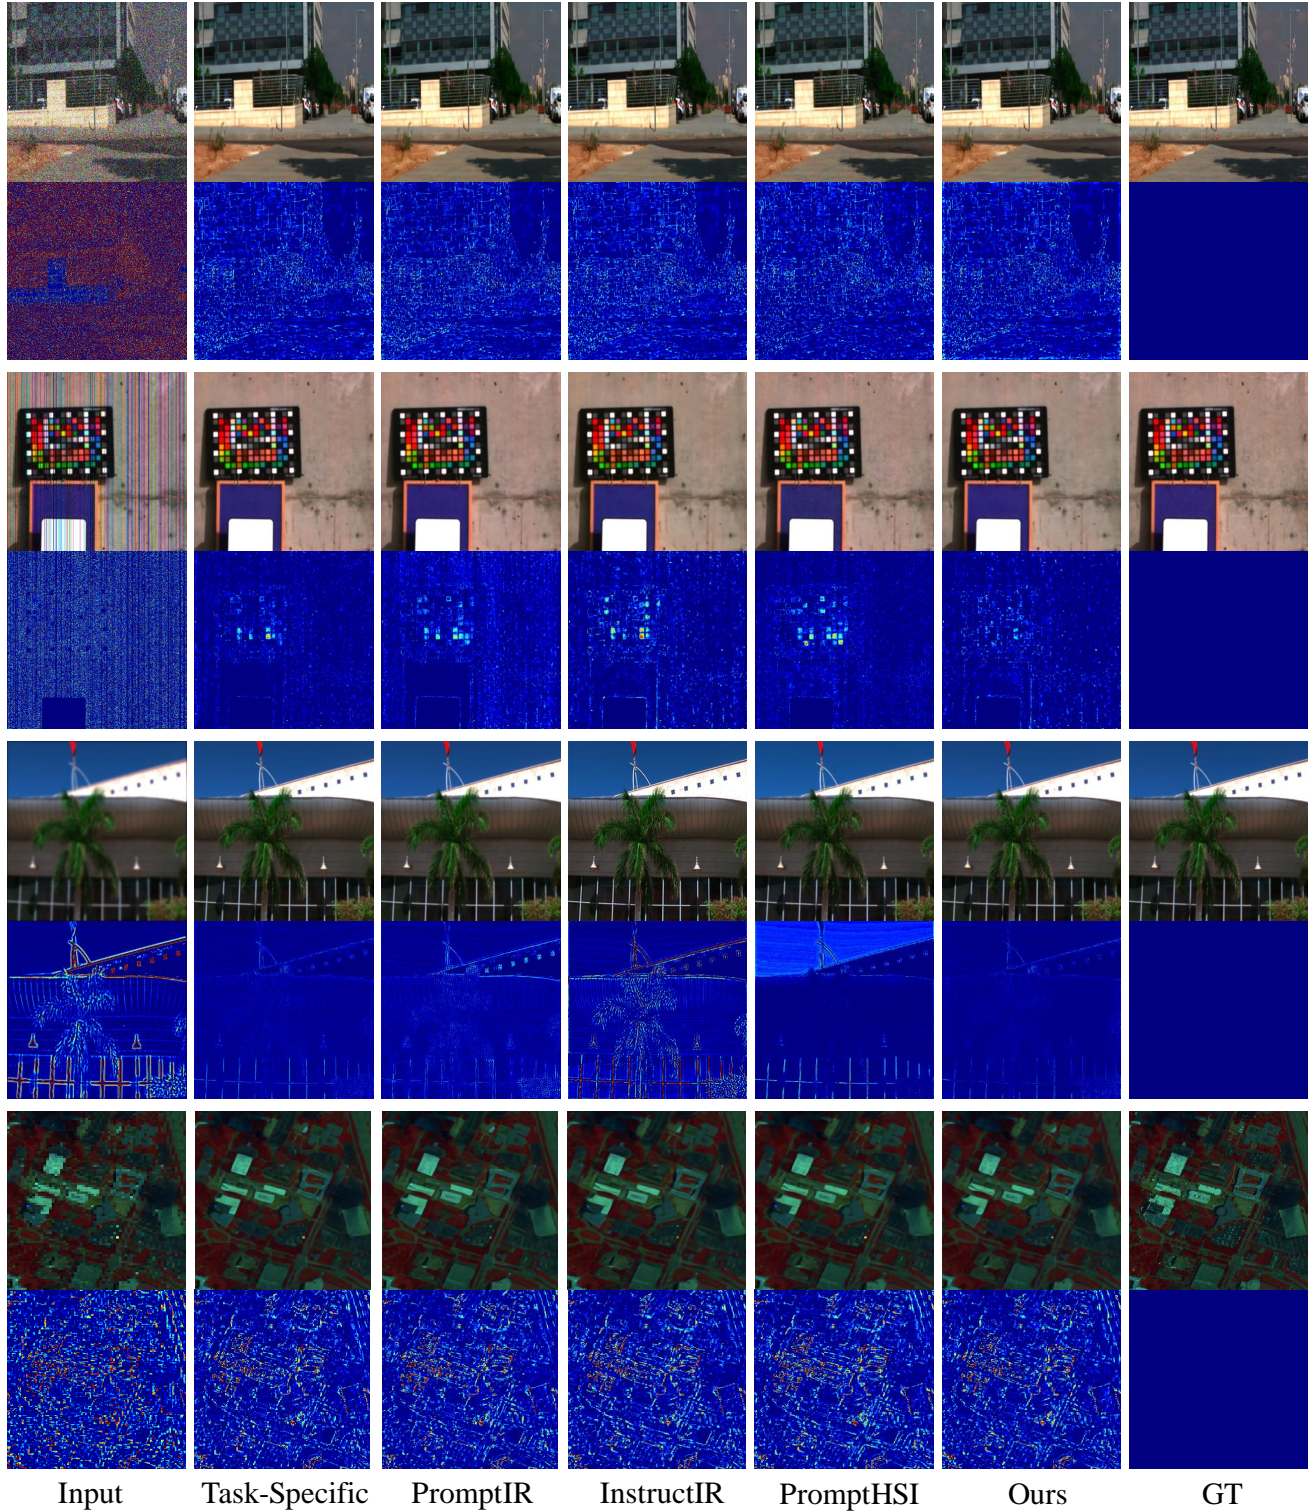

Figure 5. Visual comparison results of *Gaussian denoising*, *complex denoising*, *Gaussian deblurring*, and *super-resolution*, including the corresponding residual maps. Task-Specific represents the optimal task-specific method.



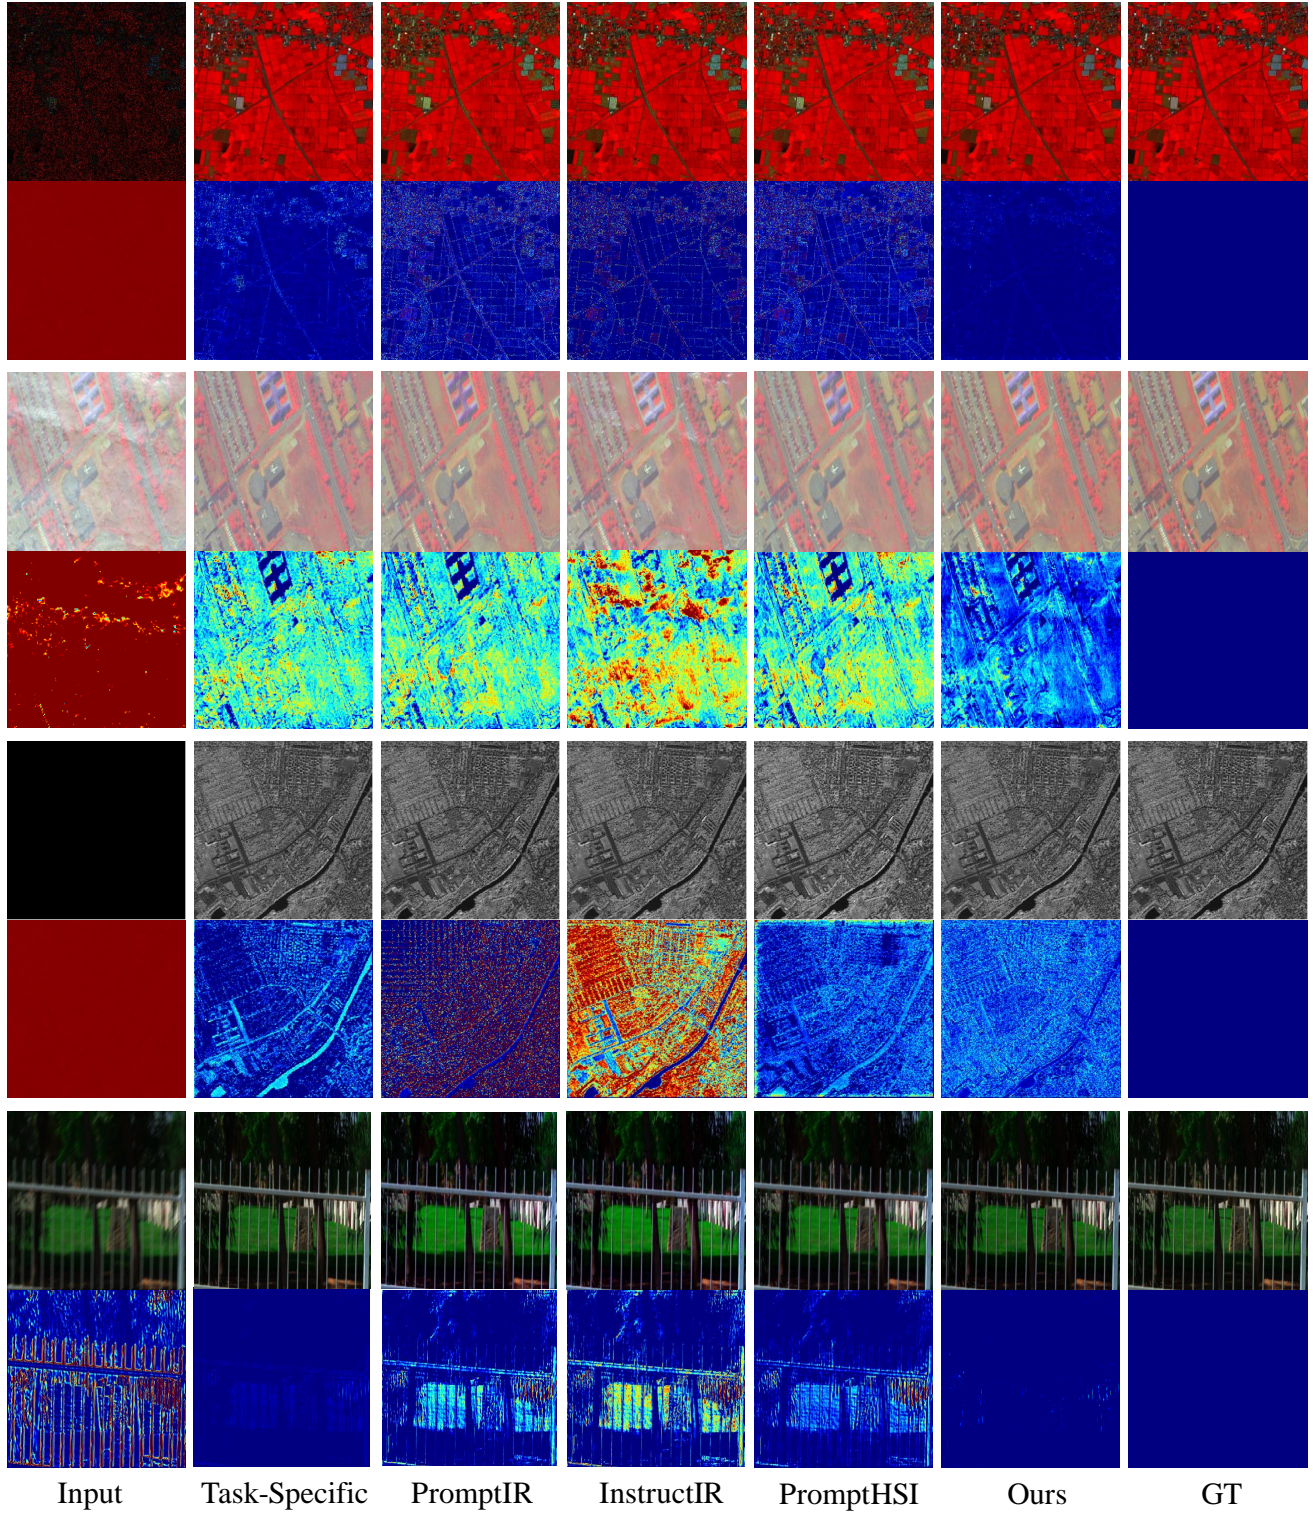

Figure 6. Visual comparison results of *Inpainting*, *Dehazing*, *Band Completion*, and *Motion Deblurring*, including the corresponding residual maps. Task-Specific represents the optimal task-specific method.



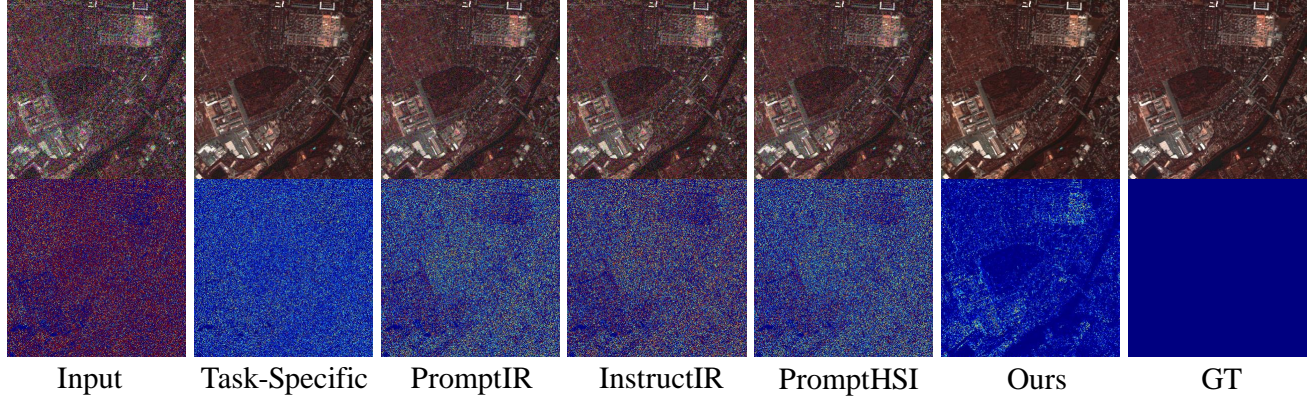

Figure 7. Visual comparison results of **Poisson Denoising**, including the corresponding residual maps. Task-Specific represents the optimal task-specific method.

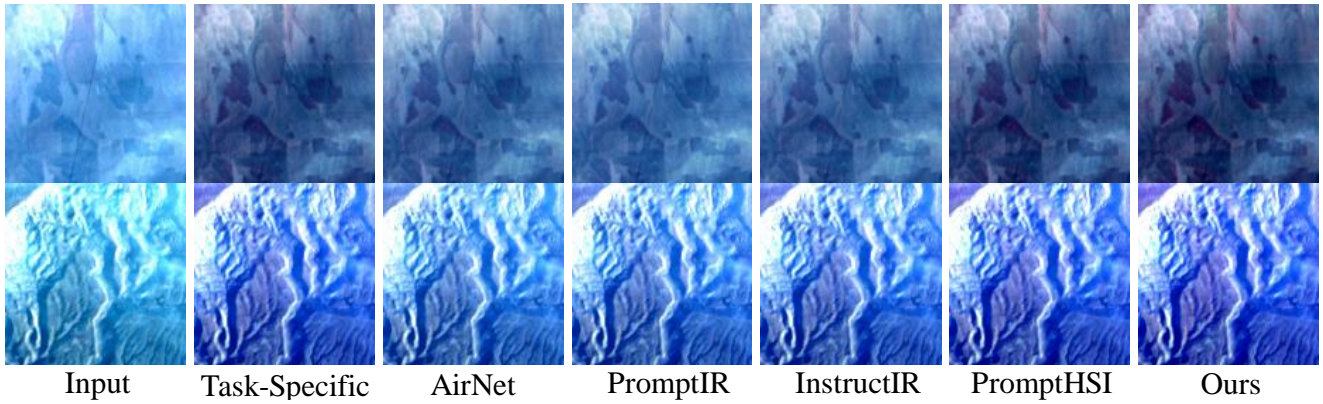

Figure 8. Visual comparison results of **Real Dehazing**. Task-Specific represents the optimal task-specific method.

- corruption. In *Proceedings of the IEEE/CVF Conference on Computer Vision and Pattern Recognition*, pages 17452–17462, 2022. 3, 4, 5, 6
- [19] Miaoyu Li, Ying Fu, and Yulun Zhang. Spatial-spectral transformer for hyperspectral image denoising. In *Proceedings of the AAAI Conference on Artificial Intelligence*, pages 1368–1376, 2023. 3, 4
- [20] Miaoyu Li, Ji Liu, Ying Fu, Yulun Zhang, and Dejing Dou. Spectral enhanced rectangle transformer for hyperspectral image denoising. In *Proceedings of the IEEE/CVF Conference on Computer Vision and Pattern Recognition*, pages 5805–5814, 2023. 3, 4
- [21] Miaoyu Li, Ying Fu, Tao Zhang, Ji Liu, Dejing Dou, Chenggang Yan, and Yulun Zhang. Latent diffusion enhanced rectangle transformer for hyperspectral image restoration. *IEEE Transactions on Pattern Analysis and Machine Intelligence*, 2024. 3, 4
- [22] Zilong Li, Yiming Lei, Chenglong Ma, Junping Zhang, and Hongming Shan. Prompt-in-prompt learning for universal image restoration. *arXiv preprint arXiv:2312.05038*, 2023. 3, 4, 5, 6
- [23] Jingyun Liang, Jiezhong Cao, Guolei Sun, Kai Zhang, Luc Van Gool, and Radu Timofte. Swinir: Image restoration using swin transformer. In *Proceedings of the IEEE/CVF International Conference on Computer Vision*, pages 1833–1844, 2021. 5
- [24] Ilya Loshchilov and Frank Hutter. Sgdr: Stochastic gradient descent with warm restarts. *arXiv preprint arXiv:1608.03983*, 2016. 1
- [25] Xiaofeng Ma, Qunming Wang, and Xiaohua Tong. A spectral grouping-based deep learning model for haze removal of hyperspectral images. *ISPRS Journal of Photogrammetry and Remote Sensing*, 188:177–189, 2022. 5
- [26] Xintian Mao, Jiansheng Wang, Xingran Xie, Qingli Li, and Yan Wang. Loformer: Local frequency transformer for image deblurring. In *Proceedings of the 32nd ACM International Conference on Multimedia*, pages 10382–10391, 2024. 4
- [27] Yuchun Miao, Lefei Zhang, Liangpei Zhang, and Dacheng Tao. Dds2m: Self-supervised denoising diffusion spatio-spectral model for hyperspectral image restoration. In *Proceedings of the IEEE/CVF International Conference on Computer Vision*, pages 12086–12096, 2023. 5
- [28] Akpona Okujeni, Sebastian van der Linden, and Patrick Hostert. Berlin-urban-gradient dataset 2009: An enmap preparatory flight campaign, 2016. Available: <https://doi.org/10.2312/enmap.2016.0021>. 2, 5

- [29] Li Pang, Xiangyu Rui, Long Cui, Hongzhong Wang, Deyu Meng, and Xiangyong Cao. Hir-diff: Unsupervised hyperspectral image restoration via improved diffusion models. In *Proceedings of the IEEE/CVF Conference on Computer Vision and Pattern Recognition*, pages 3005–3014, 2024. [5](#)
- [30] Kabir Yunus Peerbhay, Onesimo Mutanga, and Riyad Ismail. Commercial tree species discrimination using airborne aisa eagle hyperspectral imagery and partial least squares discriminant analysis (pls-da) in kwazulu-natal, south africa. *ISPRS Journal of Photogrammetry and Remote Sensing*, 79:19–28, 2013. [2](#), [4](#), [5](#)
- [31] Vaishnav Potlapalli, Syed Waqas Zamir, Salman H Khan, and Fahad Shahbaz Khan. Promptir: Prompting for all-in-one image restoration. *Advances in Neural Information Processing Systems*, 36:71275–71293, 2023. [3](#), [4](#), [5](#), [6](#)
- [32] Yuwei Qiu, Kaihao Zhang, Chenxi Wang, Wenhan Luo, Hongdong Li, and Zhi Jin. Mb-taylorformer: Multi-branch efficient transformer expanded by taylor formula for image dehazing. In *Proceedings of the IEEE/CVF International Conference on Computer Vision*, pages 12802–12813, 2023. [5](#)
- [33] Fu-Jen Tsai, Yan-Tsung Peng, Yen-Yu Lin, Chung-Chi Tsai, and Chia-Wen Lin. Stripformer: Strip transformer for fast image deblurring. In *European Conference on Computer Vision*, pages 146–162. Springer, 2022. [4](#)
- [34] Yan Wang, Yusen Li, Gang Wang, and Xiaoguang Liu. Multi-scale attention network for single image super-resolution. In *Proceedings of the IEEE/CVF Conference on Computer Vision and Pattern Recognition*, pages 5950–5960, 2024. [4](#)
- [35] Kaixuan Wei, Ying Fu, and Hua Huang. 3-d quasi-recurrent neural network for hyperspectral image denoising. *IEEE Transactions on Neural Networks and Learning Systems*, 32(1):363–375, 2020. [3](#), [4](#)
- [36] Hao Wu and Saurabh Prasad. Convolutional recurrent neural networks for hyperspectral data classification. *Remote Sensing*, 9(3):298, 2017. [1](#), [4](#)
- [37] Jingxiang Yang, Yong-Qiang Zhao, Chen Yi, and Jonathan Cheung-Wai Chan. No-reference hyperspectral image quality assessment via quality-sensitive features learning. *Remote Sensing*, 9(4):305, 2017. [3](#)
- [38] CEN Yi, Lifu Zhang, Xia Zhang, WANG Yueming, QI Wenchao, TANG Senlin, and Peng Zhang. Aerial hyperspectral remote sensing classification dataset of xiongan new area (matiwang village). *National Remote Sensing Bulletin*, 24(11): 1299–1306, 2020. [1](#), [3](#)
- [39] Naoto Yokoya and Akira Iwasaki. Airborne hyperspectral data over chikusei. *Space Appl. Lab., Univ. Tokyo, Tokyo, Japan, Tech. Rep. SAL-2016-05-27*, 5(5):5, 2016. [1](#), [5](#)
- [40] Syed Waqas Zamir, Aditya Arora, Salman Khan, Munawar Hayat, Fahad Shahbaz Khan, and Ming-Hsuan Yang. Restormer: Efficient transformer for high-resolution image restoration. In *Proceedings of the IEEE/CVF Conference on Computer Vision and Pattern Recognition*, pages 5728–5739, 2022. [5](#)
- [41] Mingjin Zhang, Chi Zhang, Qiming Zhang, Jie Guo, Xinbo Gao, and Jing Zhang. Essformer: Efficient transformer for hyperspectral image super-resolution. In *Proceedings of the IEEE/CVF International Conference on Computer Vision*, pages 23073–23084, 2023. [4](#)
- [42] Yafei Zhang, Shen Zhou, and Huafeng Li. Depth information assisted collaborative mutual promotion network for single image dehazing. In *Proceedings of the IEEE/CVF Conference on Computer Vision and Pattern Recognition*, pages 2846–2855, 2024. [5](#)
- [43] Yupeng Zhou, Zhen Li, Chun-Le Guo, Song Bai, Ming-Ming Cheng, and Qibin Hou. Srformer: Permuted self-attention for single image super-resolution. In *Proceedings of the IEEE/CVF International Conference on Computer Vision*, pages 12780–12791, 2023. [4](#)
- [44] Feiyun Zhu. Hyperspectral unmixing: ground truth labeling, datasets, benchmark performances and survey. *arXiv preprint arXiv:1708.05125*, 2017. [1](#), [4](#)
